# Supplementary material
Source: publisher figshare collection journal article supplement (https://diabetesjournals.figshare.com/ndownloader/files/31537835)
Supplement: Supplementary file 1 [file 31537835]

## Supplemental Appendix

**Supplementary Figure-1:** Flowchart of the study

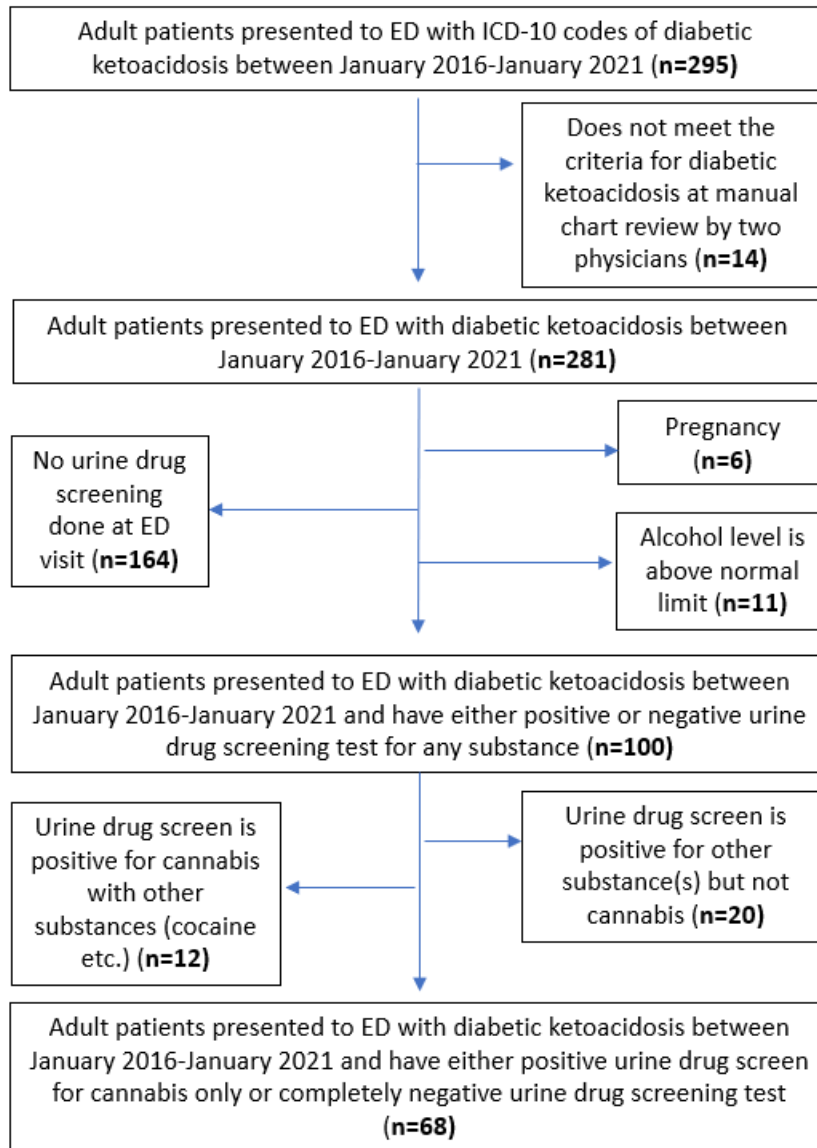

**Supplementary Table-1:** Baseline characteristics of participants

|                      | Cannabis users | Non-cannabis users |
|----------------------|----------------|--------------------|
| Age*                 | 23.6 (8.2)     | 28.2 (6.5)         |
| Gender (Female %)    | 59             | 54                 |
| Caucasian (%)        | 59             | 64                 |
| Hispanic (%)         | 29             | 26                 |
| African American (%) | 10             | 8                  |
| Others (%)           | 2              | 2                  |
| Diabetes duration*   | 8.2 (4.3)      | 11.1 (3.7)         |

\*Mean (SD)

Cannabis use was determined based on urine drug screen

**Supplementary Table-2:** Cannabis users vs non-users in patients presented with symptoms of Diabetic Ketoacidosis

|                                         | Cannabis Users | Non-Cannabis Users |
|-----------------------------------------|----------------|--------------------|
| pH $\geq$ 7.4                           | 78 (96%)       | 3 (4%)             |
| Bicarbonate $\geq$ 15                   | 73 (91%)       | 7 (9%)             |
| pH $\geq$ 7.4 and Bicarbonate $\geq$ 15 | 72 (97%)       | 2 (3%)             |

Results are n (%)

**Supplementary Table-3:** Sensitivity analysis of using different BHB cut offs to diagnose HK-CHS in cannabis users vs non-cannabis users

|                    | BHB $\geq$ 0.6 mmol/L |                    | BHB $\geq$ 3.0 mmol/L |                    |
|--------------------|-----------------------|--------------------|-----------------------|--------------------|
|                    | No Cannabis           | Cannabis           | No Cannabis           | Cannabis           |
| pH                 | 7.02 $\pm$ 0.02       | 7.43 $\pm$ 0.02**  | 7.09 $\pm$ 0.02       | 7.40 $\pm$ 0.2**   |
| Anion gap          | 23.9 $\pm$ 0.71       | 21.0 $\pm$ 0.61*   | 24.1 $\pm$ 0.76       | 21.61 $\pm$ 0.73   |
| HCO <sub>3</sub>   | 9.18 $\pm$ 0.72       | 19.21 $\pm$ 0.61** | 9.03 $\pm$ 0.76       | 18.45 $\pm$ 0.74** |
| Sensitivity        | 97%                   |                    | 99%                   |                    |
| Specificity        | 95%                   |                    | 98%                   |                    |
| ROC AUC for HK-CHS | 0.9890                |                    | 0.9890                |                    |

\*p: <0.01 \*\*p: <0.001

ROC: Receiver operating characteristic

AUC: Area under curve

HK-CHS: Hyperglycemic ketosis due to cannabis hyperemesis syndrome
